# Supplementary material for: High-Dose Vitamin D Supplementation in People With Prediabetes and Hypovitaminosis D
Source: PubMed Central journal article supplement — Diabetes Care. 2013 Jan 17;36(2):260–6. doi: 10.2337/dc12-1204 (PMC3554269; doi:10.2337/dc12-1204), 2013-01-17
Supplement: supp_dc12-1204v121204_DC121204SupplementaryData.pdf [file supp_dc12-1204v121204_DC121204SupplementaryData.pdf]

SUPPLEMENTARY DATA

**Supplementary Table 1.** Baseline Characteristics\* of the two treatment groups

|                                     | Placebo (N = 53) | Vitamin D (N = 56) |
|-------------------------------------|------------------|--------------------|
| Age (years)                         | 52.5 ±7.0        | 52.3 ±8.0          |
| Sex (females)                       | 71%              | 64%                |
| Latino                              | 83%              | 91%                |
| BMI (weight/[height] <sup>2</sup> ) | 32.9 ±4.3        | 32.1 ±4.7          |
| FPG (mg/dL)                         | 97.5 ± 9.4       | 98.7 ±8.7          |
| 2-hour glucose (mg/dL)              | 162 ±18          | 158 ± 22           |
| HbA1c (%)                           | 6.1 ± 0.4        | 6.1 ± 0.3          |
| serum 25-OHD (ng/mL)                | 22.0 ± 4.8       | 22.0 ± 4.5         |

\*Means ± SD

**Supplementary Table 2.** Association of Vitamin D Levels with Insulin Sensitivity and Insulin Secretion

|                     | Positive                                                                    | Negative                                          |
|---------------------|-----------------------------------------------------------------------------|---------------------------------------------------|
| Insulin Sensitivity | References 1-11, 12*, 13 <sup>†</sup> ,14 <sup>‡</sup> ,<br>15 <sup>§</sup> | References 14 <sup>‡</sup> , 15 <sup>§</sup> , 16 |
| Insulin Secretion   | References 9, 11 <sup>  </sup>                                              | References 3, 5, 6, 15                            |

\*Negative when adjusted for adiposity; †Negative when adjusted for physical activity; ‡Positive in obese African-American youths but negative when adjusted for adiposity, negative in obese White youths; §Positive in Mexican-Americans and Whites but not in African-Americans; ||Negative when adjusted for BMI

**Supplementary Table 3.** Effects of Vitamin D Supplementation on Insulin Secretion and Insulin Sensitivity

| Reference | Population                                                  | Vitamin D Dose & Duration                                                                   | Outcomes               | 25-OHD Level (ng/mL)                                                      | Results                                                              |
|-----------|-------------------------------------------------------------|---------------------------------------------------------------------------------------------|------------------------|---------------------------------------------------------------------------|----------------------------------------------------------------------|
| 1         | 14 men with IGT and no 25-OHD deficiency                    | 2 µg 1 alpha OH D3 per day x 18 months; No placebo                                          | IVGTT Euglycemic clamp | Not reported                                                              | <b>Sensitivity</b> – no change; <b>Secretion</b> –transient increase |
| 13        | NGT and low 25-OHD                                          | 20,000 IU D3 PO twice a week; 45 Placebo; 49 D3                                             | Hyperglycemic clamp    | Placebo 16.1* →17.1;25-OHD 16.1* →57.1; *mean of both groups              | <b>Sensitivity</b> – no difference; <b>Secretion</b> –no difference  |
| 20        | Men aged 61-65 years; 56 IGT; 9 type 2 DM treated with diet | 0.75 µg 1 alpha (OH)-D3 twice a day x 3 months;32 Placebo; 33 D3                            | IVGTT                  | Placebo 37 →42; Vitamin D 39 → 54                                         | <b>Sensitivity</b> – no difference; <b>Secretion</b> – no difference |
| 21        | Non-diabetic and IFG                                        | 700 IU D3 per day x 3 years; 114 Placebo-(NFG); 108 D3 (NFG); 47 Placebo (IFG); 45 D3 (IFG) | HOMA-IR                | Placebo (NFG) 28.2 → 27.8; 25-OHD (NFG) 32.6 → 44.4; Placebo (IFG) 32.5 → | <b>Sensitivity</b> - no change in NFG; increased in IFG              |

SUPPLEMENTARY DATA

|    |                                                                                  |                                                                         |                                                           |                                         |                                                                                                                                                 |
|----|----------------------------------------------------------------------------------|-------------------------------------------------------------------------|-----------------------------------------------------------|-----------------------------------------|-------------------------------------------------------------------------------------------------------------------------------------------------|
|    |                                                                                  |                                                                         |                                                           | 35.6;<br>25-OHD (IFG)<br>28.5 → 41.0    |                                                                                                                                                 |
| 22 | 33 NGT; 12 IGT                                                                   | 2 doses of 100,000 IU D3 PO every 2 weeks; No placebo                   | OGTT (2 weeks after 2 <sup>nd</sup> dose); HOMA-IR QUICKI | 16.0 → 36.1                             | <b>Sensitivity</b> – no change by HOMA-IR, QUICKI or Avignon’s or Gutt’s modeling of OGTT                                                       |
| 23 | 23 young healthy volunteers with low 25-OHD                                      | 300,000 IU/month IM x 3 (specific preparation not specified; No placebo | OGTT HOMA-IR                                              | 8.2 → 46.8                              | <b>Sensitivity</b> – no change by HOMA-IR or Matsuda’s modeling of OGTT; <b>Secretion</b> – no change in insulin AUC                            |
| 24 | 42 IFG/IGT; 4 type 2 DM treated with diet                                        | 2,000 IU D3 per day x 4 months; No placebo                              | FSIVGTT                                                   | 24.4 → 30.8                             | <b>Sensitivity</b> - no change; <b>Secretion</b> – increased                                                                                    |
| 19 | Healthy centrally obese Asian Indian men                                         | 120,000 IU D3 per 2 weeks PO x 3 weeks; 35 Placebo; 36 D3               | 3-hr OGTT HOMA-IR QUICKI                                  | Placebo 12.2 → 12.5; 25-OHD 14.6 → 28.6 | <b>Sensitivity</b> – no difference in HOMA-IR or QUICKI but increased with Mari’s modeling of OGTT                                              |
| 18 | Insulin resistant South Asian women                                              | 4,000 IU D3 per day x 6 months; 35 Placebo; 42 D3                       | HOMA-IR HOMA-B                                            | Placebo 7.6 → 11.6; 25-OHD 8.4 → 32.0   | <b>Sensitivity</b> – increased; <b>Secretion</b> - no difference                                                                                |
| 17 | 8 IFG with 25-OHD deficiency                                                     | 10,000 IU D3 per day x 1 month; No placebo                              | FSIVGTT                                                   | 20.6 → 44.8                             | <b>Sensitivity</b> – increased; <b>Secretion</b> – acute insulin response decreased                                                             |
| 25 | Type 2 DM treated with metformin & bedtime insulin (withheld night before study) | 4,000 IU D3 per week PO x 6 months; 16 Placebo; 16 D3                   | HOMA-IR HOMA-B                                            | Placebo 23.4 → 22.9; 25-OHD 24.0 → 67.3 | <b>Sensitivity</b> – no difference; <b>Secretion</b> – no difference                                                                            |
| 26 | Asian Indian type 2 DM treated with diet or oral drugs not changed during study  | 300,000 IU D3 per week IM x 4; 14 Placebo; 14 D3                        | OGTT HOMA-IR                                              | Placebo 16.7 → <30; 25-OHD 14.9 → 41.6  | <b>Sensitivity</b> – no difference; <b>Secretion</b> – no difference in insulin AUC                                                             |
| 27 | 4 patients with osteomalacia stated to have 25-OHD deficiency                    | 2,000 IU D3 per day x 6 months                                          | OGTT                                                      | Not reported                            | <b>Secretion</b> – increased insulin AUC                                                                                                        |
| 28 | 14 non-obese type 2 DM                                                           | 2 µg 1 alpha-OH D3 per day x 3 weeks; 7 Control; 7 D3                   | OGTT                                                      | Not reported                            | <b>Secretion</b> increased insulin AUC                                                                                                          |
| 29 | 10 type 2 DM women treated with oral drugs not changed during study              | 1332 IU D3 per day x 1 month; No placebo                                | IVGTT HOMA-IR                                             | 14.1 → 25.3                             | <b>Sensitivity</b> – no change; <b>Secretion</b> small but significant increase in 1 <sup>st</sup> phase and no change in 2 <sup>nd</sup> phase |

## SUPPLEMENTARY DATA

AUC – area under the curve; DM – diabetes mellitus; FSIVGTT – frequently sampled intravenous glucose tolerance test; HOMA-B – reflects insulin secretion; HOMA-IR – reflects insulin sensitivity; IFG – impaired fasting glucose; IGT – impaired glucose tolerance; IM –intramuscular; IU – international units; IVGTT – intravenous glucose tolerance test; NFG – normal fasting glucose; NGT – normal glucose tolerance; OGTT – oral glucose tolerance test; PO – per oral; QUICKI – reflects insulin sensitivity, D2–ergocalciferol, D3–cholecalciferol

1. Lind L, Pollare T, Hvarfner A, Lithell H, Sorensen OH, Ljunghall S. Long-term treatment with active vitamin D (alphacalcidol) in middle-age men with impaired glucose tolerance; effects on insulin secretion and sensitivity, glucose tolerance and blood pressure. *Diabetes Res* 1989;11(3):141-147.
2. Lind L, Hanni H, Hvarfner A, Sorensen OH, Ljunghall S. Vitamin D is related to blood pressure and other cardiovascular risk factors in middle-aged men. *Am J Hypertens* 1995;8(9):894-901.
3. Kamycheval E, Jorde R, Figenschau Y, Haug E. Insulin sensitivity in subjects with secondary hyperparathyroidism and the effect of a low serum 25-hydroxyvitamin D on insulin sensitivity. *J Endocrinol Invest* 2007;30(2):126-132.
4. Clifton-Bligh RJ, McElduff P, McElduff A. Maternal vitamin D deficiency, ethnicity and gestational diabetes. *Diabet Med* 2008;25(6):678-684.
5. Ashraf A, Alvarez J, Saenz K, Gower B, McCormick K, Franklin F. Threshold for effects of vitamin D deficiency on glucose metabolism in obese female African-American adolescents. *J Clin Endocrinol Metab* 2009;94(9):3200-3206.
6. Chiu KC, Chu A, Go VLW, Saad M. Hypovitaminosis D is associated with insulin resistance and  $\beta$  cell dysfunction. *Am J Clin Nutr* 2004;79(5):820-825.
7. Lu L, Yu Z, Pan A et al. Plasma 25-hydroxyvitamin D concentration and metabolic syndrome among middle-aged and elderly Chinese individuals. *Diabetes Care* 2009;32(7):1278-1283.
8. Gannage-Yared M-H, Chedid R, Khalife S, Azzi E, Zoghbi F. Vitamin D in relation to metabolic risk factors, insulin sensitivity and adiponectin in a young Middle-Eastern population. *Eur J Endocrinol* 2009;160(6):965-971.
9. Kanayanil S, Vieth R, Retnakaran R, et al. Association of vitamin D with insulin resistance and  $\beta$ -cell dysfunction in subjects at risk for type 2 diabetes. *Diabetes Care* 2010;33(6):1379-1381.
10. Zhao G, Ford ES, Li C. Associations of serum concentrations of 25-hydroxyvitamin D and parathyroid hormone with surrogate markers of insulin resistance among U.S. adults without physician-diagnosed diabetes: NHANES, 2003-2006. *Diabetes Care* 2010;33(2):344-347.
11. Gulseth HL, Gjelstad IMF, Tierney AC, et al. Serum vitamin D concentration does not predict insulin action or secretion in European subjects with the metabolic syndrome. *Diabetes Care* 2010;33(4):923-925.
12. Cheng S, Massaro JM, Fox CS et al. Adiposity, cardiometabolic risk, and vitamin D status: the Framingham Heart Study. *Diabetes* 2010;59(1):242-248.
13. Grimnes G, Figenschau Y, Almas B, Jorde R. Vitamin D, insulin secretion, sensitivity, and lipids: results from a case-control study and a randomized controlled trial using hyperglycemic clamp technique. *Diabetes* 2011;60(11):2748-2757.
14. Rajakumar K, Heras JDL, Lee S, Holick MF, Arslanian SA. 25-hydroxyvitamin D concentrations and in vivo insulin sensitivity and  $\beta$ -cell function relative to insulin sensitivity in black and white youth. *Diabetes Care* 2012;35(3):627-633.
15. Scragg R, Sowers MF, Bell C. Serum 25-hydroxyvitamin D, diabetes, and ethnicity in the Third National Health and Nutritional Examination Survey. *Diabetes Care* 2004;27(12):2813-2818.
16. de Boer IH, Tinker LF, Curb JD, et al. Calcium plus vitamin D supplementation and the risk of incident diabetes in the Women's Health Initiative. *Diabetes Care* 2008;31(4):701-707.

## SUPPLEMENTARY DATA

17. Nazarian S, St. Peter JV, Boston RC, Jones SA, Mariash CN. Vitamin D3 supplementation improves insulin sensitivity in subjects with impaired fasting glucose. *Transl Res* 2011;158(5):276-281.
  18. Von Hurst PR, Stonehouse W, Coad J. Vitamin D supplementation reduces insulin resistance in South Asian women living in New Zealand who are insulin resistant and vitamin D deficient – a randomized, placebo-controlled trial. *Br J Nutr* 2010;103(4):549-455.
  19. Nagpal J, Pande JN, Bhartia A. A double-blind, randomized, placebo-controlled trial of the short-term effect of vitamin D<sub>3</sub> supplementation on insulin sensitivity in apparently healthy, middle-aged, centrally obese men. *Diabet Med* 2009;26(1):19-27.
  20. Ljunghall S, Lind L, Lithell H, et al. Treatment with one-alpha-hydroxycholecalciferol in middle-aged men with impaired glucose tolerance -- a prospective randomized double-blind study. *Acta Med Scand* 1987;222(4):361-367.
  21. Pittas AG, Harris S, Stark PC, Dawson-Hughes B. The effects of calcium and vitamin D supplementation on blood glucose and markers of inflammation in nondiabetic adults. *Diabetes Care* 2007;30(4):980-986.
  22. Tau K, Need AG, Horowitz, Chapman IM. Glucose tolerance and vitamin D: effects of treating vitamin D deficiency. *Nutrition* 2008;24(10):950-956.
  23. Tarcin O, Yavuz DG, Ozben B, et al. Effect of vitamin D deficiency and replacement on endothelial function in asymptomatic subjects. *J Clin Endocrinol Metab* 2009;94(10):4023-4030.
  24. Mitri J, Dawson-Hughes B, Hu FB, Pittas AG. Effects of vitamin D and calcium supplementation on pancreatic  $\beta$  cell function, insulin sensitivity, and glycemia in adults at high risk of diabetes: the Calcium and Vitamin D for Diabetes Mellitus (CaDDM) randomized controlled trial. *Am J Clin Nutr* 2011;94(2):486-494.
  25. Jorde R, Figenschau Y. Supplementation with cholecalciferol does not improve glycaemic control in diabetic subjects with normal serum 25-hydroxyvitamin D levels. *Eur J Nutr* 2009;48(6):349-354.
  26. Parekh D, Sarathi V, Shivane VK, Bandgar TR, Menon PS, Shah NS. Pilot study to evaluate the effect of short-term improvement in vitamin D status on glucose tolerance in patients with type 2 diabetes mellitus. *Endocr Pract* 2010;16(4):600-608.
  27. Gedik O, Akalin S. Effects of vitamin D deficiency and repletion on insulin and glucagon secretion in man. *Diabetologia* 1986;29(3):142-145.
  28. Inomata S, Kadowaki S, Yamatani T, Fukase M, Fujita T. Effect of 1 alpha (OH)-vitamin D<sub>3</sub> on insulin secretion in diabetes mellitus. *Bone Miner* 1986;1(3):187-192.
- Borissova AM, Tankova T, Kirilov G, Dakovska I, Kovacheva R. The effect of vitamin D<sub>3</sub> on insulin secretion and peripheral insulin sensitivity in type 2 diabetic patients. *Int J Clin Pract* 2003;57(4):258-261.
